# Supplementary material for: A unified analytic framework for prioritization of non-coding variants of uncertain significance in heritable breast and ovarian cancer
Source: PubMed Central journal article supplement (PMC4828881; doi:10.1186/s12920-016-0178-5), 2016-04-11
Supplement: 12920_2016_178_MOESM2_ESM.pdf [file 12920_2016_178_MOESM2_ESM.pdf]

**Additional File 2 - Risk Categories for Individuals Eligible for Screening for a Genetic Susceptibility to Breast or Ovarian Cancers as determined by the Ontario Ministry of Health and Long Term-Care Referral Criteria for Genetic Counseling**

| Risk Category | Description                                                                                                                                                                                        |
|---------------|----------------------------------------------------------------------------------------------------------------------------------------------------------------------------------------------------|
| 1             | Ashkenazi Jewish and BC <50 years, or OC at any age                                                                                                                                                |
| 2             | BC <35 years of age                                                                                                                                                                                |
| 3             | Male BC                                                                                                                                                                                            |
| 4             | Invasive serous ovarian cancer at any age                                                                                                                                                          |
| 5             | BC <60 year, and a 1 <sup>st</sup> or 2 <sup>nd</sup> -degree relative with OC or male BC                                                                                                          |
| 6             | BC and OC in the same individual, or bilateral BC with the first case <50 years                                                                                                                    |
| 7             | Two cases of OC, both <50 years, in 1 <sup>st</sup> or 2 <sup>nd</sup> -degree relatives                                                                                                           |
| 8             | Two cases of OC, any age, in 1 <sup>st</sup> or 2 <sup>nd</sup> -degree relatives                                                                                                                  |
| 9             | Ashkenazi Jewish and BC at any age, and any family history of BC or OC                                                                                                                             |
| 10            | Three or more cases of BC or OC at any age                                                                                                                                                         |
| 11            | Relative of an individual with known <i>BRCA1</i> or <i>BRCA2</i> mutation                                                                                                                         |
| 12            | Ashkenazi Jewish and 1 <sup>st</sup> or 2 <sup>nd</sup> -degree relative or individual with: BC <50 years, or OC at any age, or male BC, or BC, any age, with positive family history of BC or OC. |
| 13            | A pedigree strongly suggestive of HBOC, i.e. risk of carrying a mutation for the individual being tested is >10%                                                                                   |

Only patients from groups 5-8, and 10 were considered for this study.
